# Supplementary material for: Dietary fatty acids and mortality risk from heart disease in US adults: an analysis based on NHANES
Source: PubMed Central journal article supplement (PMC9884296; doi:10.1038/s41598-023-28738-2), 2023-01-28
Supplement: 41598_2023_28738_MOESM1_ESM.pdf [file 41598_2023_28738_MOESM1_ESM.pdf]

## Supplementary Information

**Title:** Dietary fatty acids and mortality risk from heart disease in US adults: An analysis based on NHANES

**Authors:** Yutang Wang, Yan Fang, Paul K. Witting, Fadi J. Charchar, Christopher G. Sobey, Grant R. Drummond, Jonathan Golledge

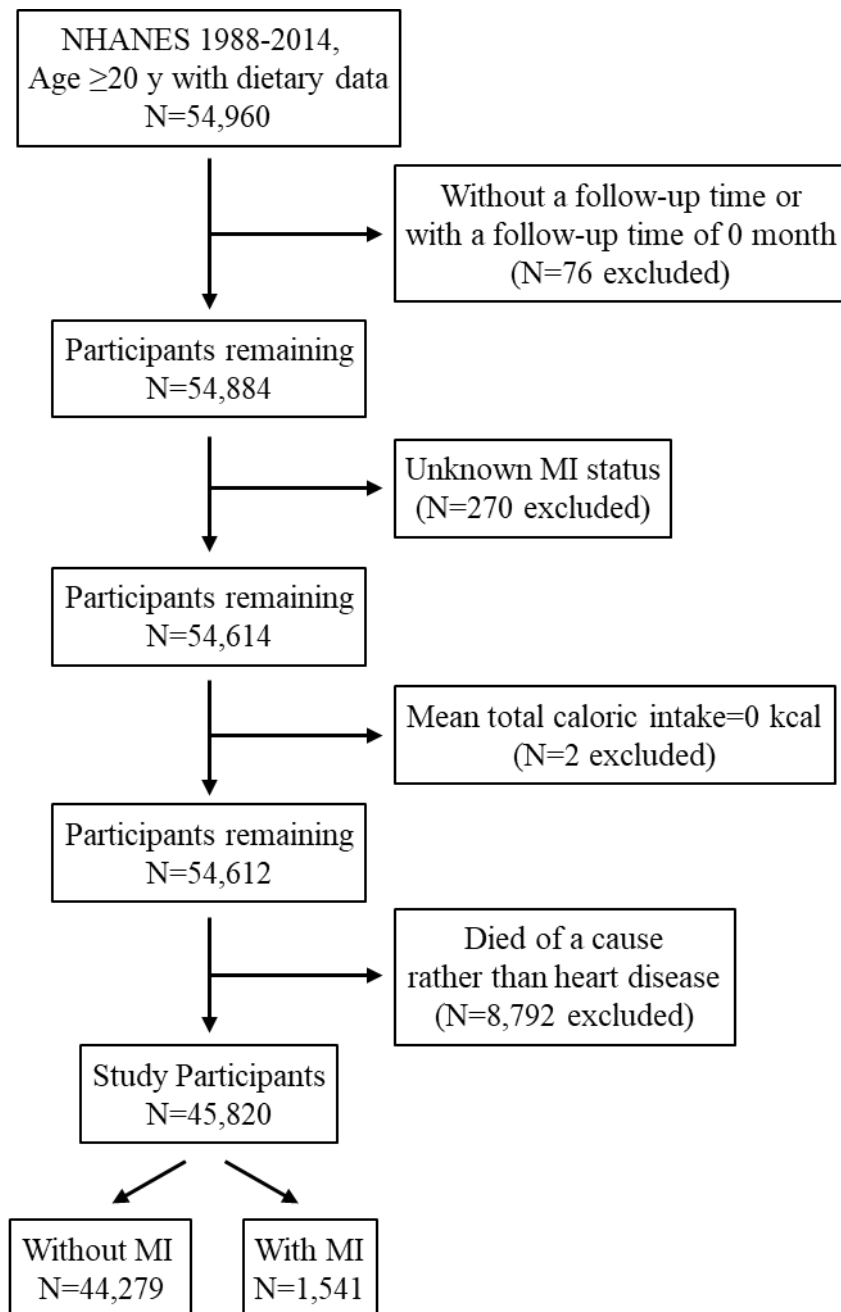

**Supplementary Figure 1.** Flow diagram of the study participants. MI, myocardial infarction; NHANES, National Health and Nutrition Examination Surveys.

**Supplementary Table 1.** Eleven randomised controlled trials investigating the effect of dietary polyunsaturated unsaturated fatty acids (PUFAs) on heart disease

| Trial number | Trial name                                            | Pub year | Participants                            | PUFAs beneficial?     | Main results                                                                                                                                                                                                                                                                                                              |
|--------------|-------------------------------------------------------|----------|-----------------------------------------|-----------------------|---------------------------------------------------------------------------------------------------------------------------------------------------------------------------------------------------------------------------------------------------------------------------------------------------------------------------|
| 1            | Rose Corn Oil Trial <sup>1</sup>                      | 1965     | With CHD                                | No. Detrimental       | % patients remaining alive and free of reinfarction were 75 % vs 52 % in the control vs treatment groups                                                                                                                                                                                                                  |
| 2            | MRC Soy Oil Trial <sup>2</sup>                        | 1968     | With MI                                 | No                    | No effect on relapse                                                                                                                                                                                                                                                                                                      |
| 3            | Oslo Diet-Heart Study <sup>3</sup>                    | 1968     | With MI                                 | Yes                   | 29% ( $P=0.011$ ) decrease in recurrent MI and new cases of angina or sudden death                                                                                                                                                                                                                                        |
| 4            | Los Angeles Veterans <sup>4</sup>                     | 1969     | Veterans                                | Maybe                 | 20% fewer MI or sudden death, but $P>0.05$                                                                                                                                                                                                                                                                                |
| 4            | Further report on Los Angeles Veterans <sup>5</sup>   | 1971     | Veterans                                | Yes                   | ↓ fatal atherosclerotic events                                                                                                                                                                                                                                                                                            |
| 5            | Sydney Diet Heart Study <sup>6</sup>                  | 1978     | With CHD                                | No. Detrimental       | Intervention had a slightly but significantly worse survival.                                                                                                                                                                                                                                                             |
| 6            | The Finnish Mental Hospital Men Study <sup>7</sup>    | 1979     | Hospital male patients                  | Yes                   | ↓ incidence of CHD                                                                                                                                                                                                                                                                                                        |
| 7            | Houtsmuller et al <sup>8</sup>                        | 1981     | Newly diagnosed T2DM                    | Yes                   | ↓diabetic microvascular disease                                                                                                                                                                                                                                                                                           |
| 8            | The Finnish Mental Hospital Women Study <sup>9</sup>  | 1983     | Hospital female patients                | Maybe                 | ↓ incidence of CHD ( $P=0.10$ )                                                                                                                                                                                                                                                                                           |
| 9            | DART <sup>10</sup>                                    | 1989     | With MI                                 | No                    | No effect on re-infarction and CHD death                                                                                                                                                                                                                                                                                  |
| 10           | The Minnesota Coronary Survey <sup>11</sup>           | 1989     | From mental hospitals and nursing homes | No                    | No effect on MI and sudden death                                                                                                                                                                                                                                                                                          |
| 11           | STARS <sup>12</sup>                                   | 1992     | With angina or past MI                  | Yes                   | ↓severity of coronary stenoses                                                                                                                                                                                                                                                                                            |
| 5            | Reanalysis of Sydney Diet Heart Study <sup>13</sup>   | 2013     | With CHD                                | No. Detrimental       | ↑ all-cause mortality ( $P=0.05$ ), cardiovascular mortality ( $P=0.04$ ), and CHD mortality ( $P=0.04$ )                                                                                                                                                                                                                 |
| 10           | Reanalysis of Minnesota Coronary Survey <sup>14</sup> | 2016     | From mental hospitals and nursing homes | No. Maybe detrimental | Partially recovered autopsy data suggested that the intervention may worsen the coronary atherosclerosis score and increase the death risk due to MI. In those aged $\geq 65$ , intervention may increase the risk of death. A 22% higher risk of death was associated with each 30 mg/dL reduction in serum cholesterol. |

↑, increase; ↓, decrease; CHD, coronary heart disease; DART: Diet and Reinfarction Trial; m, month; MRC, Medical Research Council; Pub, publication; PUFA, polyunsaturated fatty acid; STARS: St Thomas' Atheroma Regression Study; T2DM, type 2 diabetes; TC, total cholesterol; y, year.

## References

1. Rose G, Thomson W, Williams R. Corn oil in treatment of ischaemic heart disease. *BMJ* 1965;**1**:1531.
2. Morris JN, al. e. Controlled trial of soya-bean oil in myocardial infarction. *Lancet* 1968;**2**:693-700.
3. Leren P. The effect of plasma-cholesterol-lowering diet in male survivors of myocardial infarction. A controlled clinical trial. *Bull N Y Acad Med* 1968;**44**:1012-1020.
4. DAYTON S, PEARCE ML, HASHIMOTO S, DIXON WJ, TOMIYASU U. A Controlled Clinical Trial of a Diet High in Unsaturated Fat in Preventing Complications of Atherosclerosis. *Circulation* 1969;**40**:II-1-II-63.
5. Pearce ML, Dayton S. Incidence of cancer in men on a diet high in polyunsaturated fat. *Lancet* 1971;**1**:464-467.
6. Woodhill JM, Palmer AJ, Leelarthapin B, McGilchrist C, Blacket RB. Low fat, low cholesterol diet in secondary prevention of coronary heart disease. *Adv Exp Med Biol* 1978;**109**:317-330.
7. Turpeinen O, Karvonen MJ, Pekkarinen M, Miettinen M, Elosuo R, Paavilainen E. Dietary prevention of coronary heart disease: the Finnish Mental Hospital Study. *Int J Epidemiol* 1979;**8**:99-118.
8. Houtsmuller AJ, van Hal-Ferwerda J, Zahn KJ, Henkes HE. Favorable influences of linoleic acid on the progression of diabetic micro- and macroangiopathy in adult onset diabetes mellitus. *Prog Lipid Res* 1981;**20**:377-386.
9. Miettinen M, Turpeinen O, Karvonen M, Pekkarinen M, Paavilainen E, Elosuo R. Dietary prevention of coronary heart disease in women: the Finnish mental hospital study. *Int J Epidemiol* 1983;**12**:17-25.
10. Burr ML, Fehily AM, Gilbert JF, Rogers S, Holliday RM, Sweetnam PM, Elwood PC, Deadman NM. Effects of changes in fat, fish, and fibre intakes on death and myocardial reinfarction: diet and reinfarction trial (DART). *Lancet* 1989;**2**:757-761.
11. Frantz Jr I, Dawson EA, Ashman PL, Gatewood L, Bartsch G, Kuba K, Brewer E. Test of effect of lipid lowering by diet on cardiovascular risk. The Minnesota Coronary Survey. *Arteriosclerosis* 1989;**9**:129-135.
12. Watts G, Lewis B, Lewis E, Coltart D, Smith L, Swan A, Brunt J, Mann J. Effects on coronary artery disease of lipid-lowering diet, or diet plus cholestyramine, in the St Thomas' Atherosclerosis Regression Study (STARS). *Lancet* 1992;**339**:563-569.
13. Ramsden CE, Zamora D, Leelarthapin B, Majchrzak-Hong SF, Faurot KR, Suchindran CM, Ringel A, Davis JM, Hibbeln JR. Use of dietary linoleic acid for secondary prevention of coronary heart disease and death: evaluation of recovered data from the Sydney Diet Heart Study and updated meta-analysis. *BMJ* 2013;**346**:e8707.
14. Ramsden CE, Zamora D, Majchrzak-Hong S, Faurot KR, Broste SK, Frantz RP, Davis JM, Ringel A, Suchindran CM, Hibbeln JR. Re-evaluation of the traditional diet-heart hypothesis: analysis of recovered data from Minnesota Coronary Experiment (1968-73). *BMJ* 2016;**353**:i1246

**Supplementary Table 2.** Intake levels of dietary polyunsaturated unsaturated fatty acids (PUFAs) and decrease in serum cholesterol in randomised controlled trials investigating the effect of dietary PUFAs on heart disease outcomes

| Trial number | Trial name                              | % of calories from PUFAs |         | Decrease in serum cholesterol (relative to control) |                   |
|--------------|-----------------------------------------|--------------------------|---------|-----------------------------------------------------|-------------------|
|              |                                         | Intervention             | control | %                                                   | mg/dL             |
| 1            | Rose Corn Oil Trial                     | 29.5% <sup>a</sup>       | NR      | 11.8%                                               | 30.5              |
| 2            | MRC Soy Oil Trial                       | 31.3% <sup>b</sup>       | NR      | 16.6%                                               | 45.0              |
| 3            | Oslo Diet-Heart Study                   | 20.7%                    | NR      | 13.9%                                               | 41                |
| 4            | Los Angeles Veterans                    | 15.4%                    | 4.0%    | 12.7%                                               | 28                |
| 5            | Sydney Diet Heart Study                 | 15.1%                    | 8.9%    | 4.1%                                                | 11.4              |
| 6            | The Finnish Mental Hospital Men Study   | 13.6%                    | 4.6%    | 15%                                                 | 41.4              |
| 7            | Houtsmuller et al                       | 18.4%                    | 4.8%    | NR                                                  | NR                |
| 8            | The Finnish Mental Hospital Women Study | 13.6%                    | 4.6%    | 13%                                                 | 35.2              |
| 10           | DART                                    | 9%                       | 7%      | 4.0%                                                | 10                |
|              | The Minnesota Coronary Survey           | 14.7%                    | NR      | 12.8 %                                              | 29                |
| 11           | STARS                                   | 8%                       | NR      | 12.2% <sup>c</sup>                                  | 34.0 <sup>c</sup> |
|              | Mean                                    | 17.2%                    | 5.7%    | 11.6%                                               | 30.6              |

NR: not reported. See Table S1 for other abbreviations and the reference for each trial.

<sup>a</sup> A daily intake of 80 g of corn oil was reported. The daily intake of total calories was assumed as 2,442 kcal, which was the mean of the following two trials published around a similar time (1965-1969): the Oslo Diet-Heart Study (2,387 kcal) and the Los Angeles Veterans study (2,496 kcal). The percentage of calories from PUFAs was calculated using the following formula: (grams of corn oil X 9 / total calorie intake in kcal) X 100.

<sup>b</sup> A daily intake of 85 g of soybean oil was reported. The daily intake of total calories was assumed as 2,442 kcal, as explained in the above footnote. The percentage of calories from PUFAs was calculated using the following formula: (grams of soybean oil X 9 / total calorie intake in kcal) X 100.

<sup>c</sup> The St Thomas' Atheroma Regression Study (STARS) measured cholesterol in the plasma instead of serum.

**Supplementary Table 3.** A 1-natural-log increase in percentage of calorie intake from n3 or n6 fatty acids and risk for heart disease mortality among 45,820 adults

| Models                                   | n3 <sup>a</sup>  |                | n6 <sup>b</sup>  |                |
|------------------------------------------|------------------|----------------|------------------|----------------|
|                                          | HR (95% CI)      | <i>P</i> value | HR (95% CI)      | <i>P</i> value |
| Overall (N=45,820)                       |                  |                |                  |                |
| Model 1                                  | 0.77 (0.72-0.82) | <0.001         | 0.75 (0.69-0.81) | <0.001         |
| Model 2                                  | 0.78 (0.73-0.83) | <0.001         | 0.74 (0.69-0.80) | <0.001         |
| Model 3                                  | 0.95 (0.88-1.02) | 0.152          | 0.90 (0.83-0.97) | 0.008          |
| Model 4                                  | 0.96 (0.89-1.03) | 0.247          | 0.91 (0.84-0.99) | 0.024          |
| Participants with prior MI (N=1,541)     |                  |                |                  |                |
| Model 1                                  | 0.74 (0.65-0.85) | <0.001         | 0.81 (0.66-0.98) | 0.032          |
| Model 2                                  | 0.74 (0.64-0.85) | <0.001         | 0.79 (0.65-0.96) | 0.016          |
| Model 3                                  | 0.96 (0.82-1.13) | 0.647          | 0.97 (0.80-1.19) | 0.780          |
| Model 4                                  | 0.95 (0.80-1.13) | 0.555          | 0.95 (0.78-1.16) | 0.612          |
| Participants without prior MI (N=44,279) |                  |                |                  |                |
| Model 1                                  | 0.77 (0.72-0.83) | <0.001         | 0.74 (0.67-0.80) | <0.001         |
| Model 2                                  | 0.78 (0.73-0.84) | <0.001         | 0.73 (0.67-0.80) | <0.001         |
| Model 3                                  | 0.94 (0.86-1.01) | 0.104          | 0.87 (0.80-0.95) | 0.003          |
| Model 4                                  | 0.95 (0.87-1.03) | 0.190          | 0.89 (0.82-0.98) | 0.013          |

Abbreviations: CI, confidence interval; HR, hazard ratio; MI, myocardial infarction; MUFA, monounsaturated fatty acid; PUFA, polyunsaturated fatty acid; SFA, saturated fatty acid.

<sup>a</sup> n3 fatty acids included linolenic acid (18:3), stearidonic acid (18:4), eicosapentaenoic acid (20:5, EPA), docosapentaenoic acid (22:5, DPA), and docosahexaenoic acid (22:6, DHA).

<sup>b</sup> n6 fatty acids included linoleic acid (18:2) and arachidonic acid (20:4).

Model 1: adjusted for age; Model 2: adjusted for age, sex, and ethnicity; Model 3: adjusted for age, sex, ethnicity, obesity, poverty-income ratio, education, physical activity, alcohol consumption, smoking status, survey period, usual intake of protein (natural log transformed), and usual intake of carbohydrate (natural log transformed); Model 4: adjusted for all the factors in Model 3 plus systolic blood pressure (natural log transformed), total cholesterol (natural log transformed), and hemoglobin A<sub>1c</sub> (natural log transformed).

**Supplementary Table 4.** A 1-natural-log higher usual intake of fatty acids in grams (*e.g.*, from 10 g to 27 g per day) and heart disease mortality risk among 45,820 adults

| Models                                   | SFA              |                | MUFA             |                | PUFA             |                |
|------------------------------------------|------------------|----------------|------------------|----------------|------------------|----------------|
|                                          | HR (95% CI)      | <i>P</i> value | HR (95% CI)      | <i>P</i> value | HR (95% CI)      | <i>P</i> value |
| Overall (N=45,820)                       |                  |                |                  |                |                  |                |
| Model 1                                  | 0.99 (0.90-1.09) | 0.820          | 0.93 (0.84-1.02) | 0.124          | 0.76 (0.69-0.83) | <0.001         |
| Model 2                                  | 0.79 (0.72-0.88) | <0.001         | 0.73 (0.66-0.80) | <0.001         | 0.64 (0.59-0.71) | <0.001         |
| Model 3                                  | 0.96 (0.85-1.10) | 0.001          | 0.86 (0.76-0.99) | 0.029          | 0.86 (0.77-0.96) | 0.009          |
| Model 4                                  | 1.00 (0.88-1.14) | 0.957          | 0.90 (0.79-1.03) | 0.117          | 0.89 (0.79-1.00) | 0.041          |
| Participants with prior MI (N=1,541)     |                  |                |                  |                |                  |                |
| Model 1                                  | 0.85 (0.70-1.04) | 0.119          | 0.82 (0.67-1.01) | 0.067          | 0.73 (0.60-0.90) | 0.003          |
| Model 2                                  | 0.75 (0.61-0.93) | 0.007          | 0.72 (0.58-0.89) | 0.002          | 0.64 (0.52-0.79) | <0.001         |
| Model 3                                  | 1.02 (0.75-1.38) | 0.918          | 0.94 (0.69-1.28) | 0.693          | 0.94 (0.72-1.23) | 0.652          |
| Model 4                                  | 1.06 (0.77-1.44) | 0.734          | 0.94 (0.69-1.28) | 0.681          | 0.93 (0.70-1.22) | 0.577          |
| Participants without prior MI (N=44,279) |                  |                |                  |                |                  |                |
| Model 1                                  | 1.03 (0.93-1.15) | 0.578          | 0.95 (0.85-1.06) | 0.353          | 0.77 (0.69-0.85) | <0.001         |
| Model 2                                  | 0.86 (0.77-0.96) | 0.006          | 0.77 (0.69-0.86) | <0.001         | 0.67 (0.60-0.74) | <0.001         |
| Model 3                                  | 0.99 (0.86-1.15) | 0.925          | 0.86 (0.75-1.00) | 0.051          | 0.84 (0.74-0.95) | 0.007          |
| Model 4                                  | 1.02 (0.88-1.18) | 0.775          | 0.90 (0.78-1.05) | 0.183          | 0.87 (0.77-0.99) | 0.035          |

Abbreviations: CI, confidence interval; HR, hazard ratio; MI, myocardial infarction; MUFA, monounsaturated fatty acid; PUFA, polyunsaturated fatty acid; SFA, saturated fatty acid.

Model 1: adjusted for age; Model 2: adjusted for age, sex, and ethnicity; Model 3: adjusted for age, sex, ethnicity, obesity, poverty-income ratio, education, physical activity, alcohol consumption, smoking status, survey period, usual intake of protein (natural log transformed), and usual intake of carbohydrate (natural log transformed); Model 4: adjusted for all the factors in Model 3 plus systolic blood pressure (natural log transformed), total cholesterol (natural log transformed), and hemoglobin A<sub>1c</sub> (natural log transformed).

**Supplementary Table 5.** Sensitivity analysis of a 5% higher calorie intake from usual intake of fatty acids and heart disease mortality risk among 45,820 adults when comorbidities were treated as categorical variables instead of continuous variables

| Models                                   | SFA              |                | MUFA             |                | PUFA             |                |
|------------------------------------------|------------------|----------------|------------------|----------------|------------------|----------------|
|                                          | HR (95% CI)      | <i>P</i> value | HR (95% CI)      | <i>P</i> value | HR (95% CI)      | <i>P</i> value |
| Overall (N=45,820)                       |                  |                |                  |                |                  |                |
| Model 1                                  | 1.19 (1.11-1.28) | <0.001         | 1.13 (1.05-1.21) | 0.002          | 0.81 (0.74-0.89) | <0.001         |
| Model 2                                  | 1.17 (1.08-1.26) | <0.001         | 1.06 (0.99-1.14) | 0.118          | 0.83 (0.75-0.92) | <0.001         |
| Model 3                                  | 1.00 (0.93-1.08) | 0.986          | 0.93 (0.86-1.01) | 0.074          | 0.89 (0.81-0.97) | 0.012          |
| Model 4                                  | 1.02 (0.94-1.10) | 0.617          | 0.94 (0.87-1.01) | 0.103          | 0.90 (0.82-0.99) | 0.031          |
| Participants with prior MI (N=1,541)     |                  |                |                  |                |                  |                |
| Model 1                                  | 1.12 (0.94-1.33) | 0.198          | 1.10 (0.94-1.30) | 0.245          | 0.94 (0.75-1.17) | 0.571          |
| Model 2                                  | 1.11 (0.93-1.33) | 0.234          | 1.08 (0.91-1.27) | 0.386          | 0.93 (0.75-1.17) | 0.549          |
| Model 3                                  | 1.01 (0.84-1.23) | 0.892          | 0.95 (0.80-1.13) | 0.590          | 0.95 (0.77-1.18) | 0.649          |
| Model 4                                  | 1.07 (0.89-1.30) | 0.464          | 0.96 (0.81-1.13) | 0.604          | 0.89 (0.72-1.11) | 0.302          |
| Participants without prior MI (N=44,279) |                  |                |                  |                |                  |                |
| Model 1                                  | 1.21 (1.12-1.31) | <0.001         | 1.12 (1.04-1.22) | 0.005          | 0.79 (0.71-0.88) | <0.001         |
| Model 2                                  | 1.20 (1.10-1.30) | <0.001         | 1.06 (0.97-1.15) | 0.185          | 0.80 (0.72-0.90) | <0.001         |
| Model 3                                  | 1.03 (0.94-1.12) | 0.572          | 0.94 (0.86-1.02) | 0.121          | 0.86 (0.78-0.96) | 0.007          |
| Model 4                                  | 1.03 (0.94-1.12) | 0.526          | 0.94 (0.86-1.02) | 0.132          | 0.89 (0.80-0.99) | 0.035          |

Abbreviations: CI, confidence interval; HR, hazard ratio; MI, myocardial infarction; MUFA, monounsaturated fatty acid; PUFA, polyunsaturated fatty acid; SFA, saturated fatty acid.

Model 1: adjusted for age; Model 2: adjusted for age, sex, and ethnicity; Model 3: adjusted for age, sex, ethnicity, obesity, poverty-income ratio, education, physical activity, alcohol consumption, smoking status, survey period, usual intake of protein (natural log transformed), and usual intake of carbohydrate (natural log transformed); Model 4: adjusted for all the factors in Model 3 plus comorbidities including hypertension, hypercholesterolemia, and diabetes.



**Supplementary Table 6.** Sensitivity analysis of quartiles of percentage of calories from usual intake of fatty acids and heart disease mortality risk among 45,820 adults when comorbidities were treated as categorical instead of continuous variables

| Quartile                                 | SFA                      |                | MUFA                     |                | PUFA                     |                |
|------------------------------------------|--------------------------|----------------|--------------------------|----------------|--------------------------|----------------|
|                                          | HR <sup>a</sup> (95% CI) | <i>P</i> value | HR <sup>a</sup> (95% CI) | <i>P</i> value | HR <sup>a</sup> (95% CI) | <i>P</i> value |
| Overall (N=45,820)                       |                          |                |                          |                |                          |                |
| Q1                                       | Reference                |                | Reference                |                | Reference                |                |
| Q2                                       | 1.01 (0.89-1.14)         | 0.910          | 0.90 (0.80-1.02)         | 0.105          | 0.96 (0.86-1.08)         | 0.476          |
| Q3                                       | 1.02 (0.90-1.15)         | 0.790          | 1.04 (0.93-1.17)         | 0.497          | 0.90 (0.80-1.01)         | 0.067          |
| Q4                                       | 1.08 (0.95-1.21)         | 0.242          | 0.92 (0.81-1.03)         | 0.157          | 0.90 (0.80-1.01)         | 0.063          |
| Participants with prior MI (N=1,541)     |                          |                |                          |                |                          |                |
| Q1                                       | Reference                |                | Reference                |                | Reference                |                |
| Q2                                       | 1.02 (0.78-1.35)         | 0.873          | 1.03 (0.78-1.36)         | 0.822          | 1.03 (0.79-1.36)         | 0.817          |
| Q3                                       | 1.20 (0.91-1.59)         | 0.191          | 1.01 (0.77-1.32)         | 0.957          | 0.83 (0.63-1.09)         | 0.174          |
| Q4                                       | 1.15 (0.86-1.52)         | 0.349          | 1.00 (0.76-1.33)         | 0.998          | 0.91 (0.71-1.18)         | 0.483          |
| Participants without prior MI (N=44,279) |                          |                |                          |                |                          |                |
| Q1                                       | Reference                |                | Reference                |                | Reference                |                |
| Q2                                       | 1.01 (0.88-1.16)         | 0.893          | 0.87 (0.75-1.00)         | 0.044          | 0.94 (0.83-1.07)         | 0.331          |
| Q3                                       | 1.00 (0.87-1.15)         | 0.985          | 1.04 (0.91-1.19)         | 0.562          | 0.90 (0.79-1.03)         | 0.128          |
| Q4                                       | 1.09 (0.95-1.25)         | 0.203          | 0.92 (0.80-1.05)         | 0.219          | 0.87 (0.76-0.99)         | 0.028          |

Abbreviations: CI, confidence interval; HR, hazard ratio; MI, myocardial infarction; MUFA, monounsaturated fatty acid; PUFA, polyunsaturated fatty acid; Q, quartile; SFA, saturated fatty acid.

<sup>a</sup> Adjusted for age, sex, ethnicity, obesity, poverty-income ratio, education, physical activity, alcohol consumption, smoking status, survey period, usual intake of protein (natural log transformed), usual intake of carbohydrate (natural log transformed), and comorbidities including hypertension, hypercholesterolemia, and diabetes.

**Supplementary Table 7.** Sensitivity analysis of a 5% higher calorie intake from usual intake of fatty acids and heart disease mortality risk among 42,560 adults <sup>a</sup> when participants with missing data on systolic blood pressure, total cholesterol, or hemoglobin A<sub>1c</sub> were excluded

| Models                                   | SFA              |                | MUFA             |                | PUFA             |                |
|------------------------------------------|------------------|----------------|------------------|----------------|------------------|----------------|
|                                          | HR (95% CI)      | <i>P</i> value | HR (95% CI)      | <i>P</i> value | HR (95% CI)      | <i>P</i> value |
| Overall (N=42,560)                       |                  |                |                  |                |                  |                |
| Model 1                                  | 1.19 (1.10-1.28) | <0.001         | 1.13 (1.05-1.22) | 0.002          | 0.82 (0.74-0.91) | <0.001         |
| Model 2                                  | 1.16 (1.08-1.26) | <0.001         | 1.06 (0.99-1.15) | 0.114          | 0.84 (0.76-0.93) | 0.001          |
| Model 3                                  | 1.00 (0.92-1.08) | 0.974          | 0.94 (0.87-1.02) | 0.112          | 0.89 (0.80-0.98) | 0.018          |
| Model 4                                  | 1.01 (0.93-1.09) | 0.824          | 0.96 (0.88-1.03) | 0.254          | 0.91 (0.82-1.00) | 0.058          |
| Participants with prior MI (N=1,437)     |                  |                |                  |                |                  |                |
| Model 1                                  | 1.11 (0.93-1.33) | 0.252          | 1.08 (0.91-1.28) | 0.355          | 0.96 (0.76-1.20) | 0.699          |
| Model 2                                  | 1.10 (0.92-1.32) | 0.307          | 1.06 (0.89-1.25) | 0.525          | 0.94 (0.75-1.19) | 0.615          |
| Model 3                                  | 0.98 (0.80-1.20) | 0.845          | 0.96 (0.80-1.15) | 0.622          | 0.91 (0.73-1.14) | 0.403          |
| Model 4                                  | 1.01 (0.83-1.24) | 0.899          | 0.95 (0.80-1.14) | 0.604          | 0.89 (0.71-1.11) | 0.293          |
| Participants without prior MI (N=41,123) |                  |                |                  |                |                  |                |
| Model 1                                  | 1.21 (1.12-1.32) | <0.001         | 1.13 (1.04-1.23) | 0.004          | 0.80 (0.71-0.89) | <0.001         |
| Model 2                                  | 1.20 (1.10-1.31) | <0.001         | 1.06 (0.98-1.16) | 0.154          | 0.81 (0.72-0.91) | <0.001         |
| Model 3                                  | 1.03 (0.94-1.12) | 0.535          | 0.94 (0.86-1.03) | 0.186          | 0.87 (0.78-0.97) | 0.011          |
| Model 4                                  | 1.03 (0.95-1.13) | 0.485          | 0.96 (0.88-1.05) | 0.381          | 0.89 (0.80-1.00) | 0.044          |

Abbreviations: CI, confidence interval; HR, hazard ratio; MI, myocardial infarction; MUFA, monounsaturated fatty acid; PUFA, polyunsaturated fatty acid; SFA, saturated fatty acid.

<sup>a</sup> A total of 3,260 participants were excluded due to missing data on systolic blood pressure, total cholesterol, or hemoglobin A<sub>1c</sub>. Therefore, the remaining 42,560 participants were included in the final analysis.

Model 1: adjusted for age; Model 2: adjusted for age, sex, and ethnicity; Model 3: adjusted for age, sex, ethnicity, obesity, poverty-income ratio, education, physical activity, alcohol consumption, smoking status, survey period, usual intake of protein (natural log transformed), and usual intake of carbohydrate (natural log transformed); Model 4: adjusted for all the factors in Model 3 plus systolic blood pressure (natural log transformed), total cholesterol (natural log transformed), and hemoglobin A<sub>1c</sub> (natural log transformed).

**Supplementary Table 8.** Sensitivity analysis of quartiles of percentage of calories from usual intake of fatty acids and heart disease mortality risk among 42,560 adults <sup>a</sup> when participants with missing data on systolic blood pressure, total cholesterol, or hemoglobin A<sub>1c</sub> were excluded

| Quartile                                 | SFA                      |                | MUFA                     |                | PUFA                     |                |
|------------------------------------------|--------------------------|----------------|--------------------------|----------------|--------------------------|----------------|
|                                          | HR <sup>b</sup> (95% CI) | <i>P</i> value | HR <sup>b</sup> (95% CI) | <i>P</i> value | HR <sup>b</sup> (95% CI) | <i>P</i> value |
| Overall (N=45,820)                       |                          |                |                          |                |                          |                |
| Q1                                       | Reference                |                | Reference                |                | Reference                |                |
| Q2                                       | 1.01 (0.89-1.14)         | 0.891          | 1.07 (0.94-1.21)         | 0.315          | 0.99 (0.88-1.12)         | 0.896          |
| Q3                                       | 1.01 (0.89-1.14)         | 0.913          | 1.00 (0.88-1.13)         | 0.977          | 0.89 (0.79-1.01)         | 0.062          |
| Q4                                       | 1.05 (0.92-1.19)         | 0.473          | 1.12 (0.99-1.26)         | 0.070          | 0.91 (0.81-1.03)         | 0.122          |
| Participants with prior MI (N=1,541)     |                          |                |                          |                |                          |                |
| Q1                                       | Reference                |                | Reference                |                | Reference                |                |
| Q2                                       | 0.95 (0.71-1.28)         | 0.749          | 1.01 (0.75-1.35)         | 0.947          | 1.06 (0.8-1.41)          | 0.671          |
| Q3                                       | 0.92 (0.68-1.24)         | 0.575          | 1.10 (0.83-1.47)         | 0.505          | 0.91 (0.68-1.21)         | 0.505          |
| Q4                                       | 1.08 (0.82-1.42)         | 0.592          | 0.97 (0.73-1.28)         | 0.801          | 0.91 (0.69-1.19)         | 0.476          |
| Participants without prior MI (N=44,279) |                          |                |                          |                |                          |                |
| Q1                                       | Reference                |                | Reference                |                | Reference                |                |
| Q2                                       | 0.92 (0.80-1.06)         | 0.257          | 1.05 (0.91-1.20)         | 0.537          | 0.96 (0.84-1.1)          | 0.580          |
| Q3                                       | 0.93 (0.82-1.07)         | 0.329          | 0.97 (0.84-1.12)         | 0.674          | 0.89 (0.77-1.02)         | 0.088          |
| Q4                                       | 0.91 (0.80-1.04)         | 0.170          | 1.10 (0.97-1.26)         | 0.139          | 0.87 (0.76-0.99)         | 0.040          |

Abbreviations: CI, confidence interval; HR, hazard ratio; MI, myocardial infarction; MUFA, monounsaturated fatty acid; PUFA, polyunsaturated fatty acid; Q, quartile; SFA, saturated fatty acid.

<sup>a</sup> A total of 3,260 participants were excluded due to missing data on systolic blood pressure, total cholesterol, or hemoglobin A<sub>1c</sub>. Therefore, the remaining 42,560 participants were included in the final analysis.

<sup>b</sup> Adjusted for age, sex, ethnicity, obesity, poverty-income ratio, education, physical activity, alcohol consumption, smoking status, survey period, usual intake of protein (natural log transformed), usual intake of carbohydrate (natural log transformed), systolic blood pressure (natural log transformed), total cholesterol (natural log transformed), and hemoglobin A<sub>1c</sub> (natural log transformed).

**Supplementary Table 9.** Sensitivity analysis of a 5% higher calorie intake from fatty acids and heart disease mortality risk among 45,820 adults when usual intake of fatty acids was replaced with mean intake of fatty acids

| Models                                   | SFA              |                | MUFA             |                | PUFA             |                |
|------------------------------------------|------------------|----------------|------------------|----------------|------------------|----------------|
|                                          | HR (95% CI)      | <i>P</i> value | HR (95% CI)      | <i>P</i> value | HR (95% CI)      | <i>P</i> value |
| Overall (N=45,820)                       |                  |                |                  |                |                  |                |
| Model 1                                  | 1.11 (1.05-1.17) | <0.001         | 1.07 (1.01-1.13) | 0.016          | 0.84 (0.79-0.90) | <0.001         |
| Model 2                                  | 1.08 (1.02-1.14) | 0.006          | 1.01 (0.96-1.07) | 0.745          | 0.84 (0.78-0.90) | <0.001         |
| Model 3                                  | 1.00 (0.95-1.06) | 0.998          | 0.95 (0.90-1.01) | 0.093          | 0.92 (0.86-0.98) | 0.014          |
| Model 4                                  | 1.01 (0.95-1.07) | 0.773          | 0.97 (0.91-1.02) | 0.227          | 0.94 (0.87-1.00) | 0.049          |
| Participants with prior MI (N=1,541)     |                  |                |                  |                |                  |                |
| Model 1                                  | 1.05 (0.93-1.20) | 0.416          | 1.04 (0.93-1.18) | 0.482          | 0.92 (0.79-1.08) | 0.306          |
| Model 2                                  | 1.04 (0.92-1.18) | 0.547          | 1.02 (0.90-1.15) | 0.778          | 0.91 (0.77-1.06) | 0.220          |
| Model 3                                  | 1.01 (0.88-1.15) | 0.924          | 0.97 (0.86-1.09) | 0.571          | 0.97 (0.83-1.12) | 0.646          |
| Model 4                                  | 1.03 (0.90-1.17) | 0.723          | 0.96 (0.85-1.08) | 0.500          | 0.96 (0.82-1.11) | 0.560          |
| Participants without prior MI (N=44,279) |                  |                |                  |                |                  |                |
| Model 1                                  | 1.13 (1.06-1.20) | <0.001         | 1.07 (1.01-1.14) | 0.028          | 0.83 (0.77-0.89) | <0.001         |
| Model 2                                  | 1.11 (1.04-1.18) | 0.001          | 1.01 (0.95-1.08) | 0.705          | 0.82 (0.76-0.89) | <0.001         |
| Model 3                                  | 1.02 (0.96-1.09) | 0.503          | 0.96 (0.90-1.02) | 0.191          | 0.90 (0.84-0.97) | 0.008          |
| Model 4                                  | 1.03 (0.97-1.09) | 0.412          | 0.98 (0.92-1.04) | 0.420          | 0.92 (0.86-0.99) | 0.034          |

Abbreviations: CI, confidence interval; HR, hazard ratio; MI, myocardial infarction; MUFA, monounsaturated fatty acid; PUFA, polyunsaturated fatty acid; SFA, saturated fatty acid.

Model 1: adjusted for age; Model 2: adjusted for age, sex, and ethnicity; Model 3: adjusted for age, sex, ethnicity, obesity, poverty-income ratio, education, physical activity, alcohol consumption, smoking status, survey period, mean protein intake, and mean carbohydrate intake; Model 4: adjusted for all the factors in Model 3 plus systolic blood pressure (natural log transformed), total cholesterol (natural log transformed), and hemoglobin A<sub>1c</sub> (natural log transformed).

**Supplementary Table 10.** Sensitivity analysis of a 5% higher calorie intake from usual intake of fatty acids and heart disease mortality risk among 34,501 adults <sup>a</sup> with further adjustment for C-reactive protein

| Models                                   | SFA              |                | MUFA             |                | PUFA             |                |
|------------------------------------------|------------------|----------------|------------------|----------------|------------------|----------------|
|                                          | HR (95% CI)      | <i>P</i> value | HR (95% CI)      | <i>P</i> value | HR (95% CI)      | <i>P</i> value |
| Overall (N=34,501)                       |                  |                |                  |                |                  |                |
| Model 1                                  | 1.02 (0.94-1.11) | 0.624          | 0.94 (0.87-1.02) | 0.145          | 0.89 (0.81-0.99) | 0.024          |
| Model 2                                  | 1.01 (0.93-1.10) | 0.798          | 0.94 (0.87-1.02) | 0.156          | 0.90 (0.81-0.99) | 0.034          |
| Participants with prior MI (N=1,143)     |                  |                |                  |                |                  |                |
| Model 1                                  | 1.06 (0.86-1.31) | 0.575          | 0.95 (0.79-1.13) | 0.540          | 0.85 (0.68-1.08) | 0.182          |
| Model 2                                  | 1.04 (0.85-1.28) | 0.703          | 0.96 (0.8-1.14)  | 0.616          | 0.83 (0.66-1.05) | 0.113          |
| Participants without prior MI (N=33,358) |                  |                |                  |                |                  |                |
| Model 1                                  | 1.03 (0.94-1.13) | 0.495          | 0.95 (0.87-1.03) | 0.224          | 0.88 (0.79-0.99) | 0.031          |
| Model 2                                  | 1.02 (0.94-1.12) | 0.607          | 0.95 (0.87-1.04) | 0.225          | 0.89 (0.80-1.00) | 0.045          |

Abbreviations: CI, confidence interval; HR, hazard ratio; MI, myocardial infarction; MUFA, monounsaturated fatty acid; PUFA, polyunsaturated fatty acid; SFA, saturated fatty acid.

<sup>a</sup> 11,319 out of the 45,820 participants did not have C-reactive protein values and were excluded from the analysis. Therefore, 34,501 participants were included in the final analysis.

Model 1: adjusted for age, sex, ethnicity, obesity, poverty-income ratio, education, physical activity, alcohol consumption, smoking status, survey period, usual intake of protein (natural log transformed), usual intake of carbohydrate (natural log transformed), hypertension, hypercholesterolemia, and diabetes.

Model 2: adjusted for all the factors in Model 1 plus C-reactive protein.

**Supplementary Table 11.** Sensitivity analysis of a 5% higher calorie intake from usual intake of fatty acids and risk for heart disease mortality among 45,414 <sup>a</sup> adults when total energy intake was adjusted and BMI was treated as a continuous variable.

| Models                                   | SFA              |                | MUFA             |                | PUFA             |                |
|------------------------------------------|------------------|----------------|------------------|----------------|------------------|----------------|
|                                          | HR (95% CI)      | <i>P</i> value | HR (95% CI)      | <i>P</i> value | HR (95% CI)      | <i>P</i> value |
| Overall (N=45,414)                       |                  |                |                  |                |                  |                |
| Model 1                                  | 1.18 (1.09-1.27) | <0.001         | 1.12 (1.04-1.20) | 0.004          | 0.82 (0.74-0.90) | <0.001         |
| Model 2                                  | 1.16 (1.07-1.25) | <0.001         | 1.05 (0.98-1.13) | 0.180          | 0.84 (0.76-0.93) | 0.001          |
| Model 3                                  | 1.01 (0.92-1.10) | 0.859          | 0.91 (0.83-1.01) | 0.066          | 0.91 (0.82-1.00) | 0.057          |
| Model 4                                  | 1.03 (0.94-1.12) | 0.522          | 0.94 (0.85-1.03) | 0.197          | 0.92 (0.83-1.02) | 0.106          |
| Participants with prior MI (N=1,510)     |                  |                |                  |                |                  |                |
| Model 1                                  | 1.13 (0.94-1.34) | 0.188          | 1.11 (0.94-1.31) | 0.208          | 0.96 (0.77-1.21) | 0.75           |
| Model 2                                  | 1.12 (0.94-1.34) | 0.220          | 1.09 (0.92-1.29) | 0.316          | 0.96 (0.77-1.20) | 0.741          |
| Model 3                                  | 0.99 (0.79-1.26) | 0.955          | 0.92 (0.72-1.16) | 0.465          | 0.97 (0.77-1.24) | 0.825          |
| Model 4                                  | 1.03 (0.81-1.31) | 0.788          | 0.90 (0.70-1.14) | 0.367          | 0.95 (0.75-1.21) | 0.676          |
| Participants without prior MI (N=43,904) |                  |                |                  |                |                  |                |
| Model 1                                  | 1.20 (1.10-1.30) | <0.001         | 1.11 (1.02-1.20) | 0.016          | 0.79 (0.71-0.88) | <0.001         |
| Model 2                                  | 1.18 (1.08-1.28) | <0.001         | 1.04 (0.96-1.14) | 0.307          | 0.81 (0.72-0.90) | <0.001         |
| Model 3                                  | 1.03 (0.94-1.14) | 0.523          | 0.91 (0.81-1.01) | 0.079          | 0.87 (0.78-0.98) | 0.019          |
| Model 4                                  | 1.05 (0.95-1.16) | 0.323          | 0.94 (0.84-1.05) | 0.255          | 0.89 (0.79-1.00) | 0.042          |

Abbreviations: BMI, body mass index; CI, confidence interval; HR, hazard ratio; MI, myocardial infarction; MUFA, monounsaturated fatty acid; PUFA, polyunsaturated fatty acid; SFA, saturated fatty acid.

<sup>a</sup> A total of 406 participants who did not have BMI data were excluded. Therefore 45,414 participants were included in the analysis.

Model 1: adjusted for age; Model 2: adjusted for age, sex, and ethnicity; Model 3: adjusted for age, sex, ethnicity, BMI (natural log transformed), poverty-income ratio, education, physical activity, alcohol consumption, smoking status, survey period, usual intake of protein (natural log transformed), usual intake of carbohydrate (natural log transformed), and mean total energy intake (natural log transformed); Model 4: adjusted for all the factors in Model 3 plus systolic blood pressure (natural log transformed), total cholesterol (natural log transformed), and hemoglobin A<sub>1c</sub> (natural log transformed).

**Supplementary Table 12.** Sensitivity analysis of a 5% higher calorie intake from usual intake of fatty acids and risk for heart disease mortality among 45,820 adults with further adjustment for the use of aspirin and statin

| Models                                   | SFA              |                | MUFA             |                | PUFA             |                |
|------------------------------------------|------------------|----------------|------------------|----------------|------------------|----------------|
|                                          | HR (95% CI)      | <i>P</i> value | HR (95% CI)      | <i>P</i> value | HR (95% CI)      | <i>P</i> value |
| Overall (N=45,820)                       |                  |                |                  |                |                  |                |
| Model 1                                  | 1.02 (0.94-1.10) | 0.673          | 0.95 (0.88-1.03) | 0.224          | 0.91 (0.83-1.00) | 0.048          |
| Model 2                                  | 1.02 (0.94-1.1)  | 0.671          | 0.95 (0.88-1.03) | 0.225          | 0.91 (0.83-1.00) | 0.047          |
| Model 3                                  | 1.02 (0.95-1.1)  | 0.588          | 0.96 (0.89-1.03) | 0.241          | 0.91 (0.83-1.00) | 0.044          |
| Model 4                                  | 1.02 (0.95-1.1)  | 0.588          | 0.96 (0.89-1.03) | 0.242          | 0.91 (0.82-1.00) | 0.044          |
| Participants with prior MI (N=1,541)     |                  |                |                  |                |                  |                |
| Model 1                                  | 1.05 (0.86-1.27) | 0.652          | 0.95 (0.80-1.13) | 0.540          | 0.94 (0.75-1.16) | 0.546          |
| Model 2                                  | 1.04 (0.86-1.27) | 0.658          | 0.95 (0.80-1.13) | 0.532          | 0.93 (0.75-1.16) | 0.537          |
| Model 3                                  | 1.04 (0.86-1.26) | 0.673          | 0.95 (0.80-1.13) | 0.534          | 0.93 (0.75-1.16) | 0.541          |
| Model 4                                  | 1.04 (0.86-1.26) | 0.676          | 0.95 (0.79-1.13) | 0.526          | 0.93 (0.75-1.16) | 0.533          |
| Participants without prior MI (N=44,279) |                  |                |                  |                |                  |                |
| Model 1                                  | 1.04 (0.95-1.13) | 0.413          | 0.96 (0.88-1.05) | 0.340          | 0.89 (0.80-0.99) | 0.032          |
| Model 2                                  | 1.04 (0.95-1.13) | 0.413          | 0.96 (0.88-1.05) | 0.340          | 0.89 (0.80-0.99) | 0.031          |
| Model 3                                  | 1.04 (0.95-1.13) | 0.396          | 0.96 (0.88-1.05) | 0.346          | 0.89 (0.80-0.99) | 0.031          |
| Model 4                                  | 1.04 (0.95-1.13) | 0.396          | 0.96 (0.88-1.05) | 0.346          | 0.89 (0.80-0.99) | 0.030          |

Abbreviations: CI, confidence interval; HR, hazard ratio; MI, myocardial infarction; MUFA, monounsaturated fatty acid; PUFA, polyunsaturated fatty acid; SFA, saturated fatty acid.

Model 1: adjusted for age, sex, ethnicity, obesity, poverty-income ratio, education, physical activity, alcohol consumption, smoking status, survey period, usual intake of protein (natural log transformed), usual intake of carbohydrate (natural log transformed), systolic blood pressure (natural log transformed), total cholesterol (natural log transformed), and hemoglobin A<sub>1c</sub> (natural log transformed); Model 2: adjusted for all the factors in Model 1 plus use of aspirin (yes or no); Model 3: adjusted for all the factors in Model 1 plus use of statin (yes or no); Model 4: adjusted for all the factors in Model 1 plus use of aspirin (yes or no) and use of statin (yes or no).

**Supplementary Table 13.** Sensitivity analysis of a 5% higher calorie intake from usual intake of fatty acids and risk for heart disease mortality among 42,084<sup>a</sup> adults when those who had a mean total caloric intake of <500 or >3,500 kcal/day were excluded

| Models                                   | SFA              |                | MUFA             |                | PUFA             |                |
|------------------------------------------|------------------|----------------|------------------|----------------|------------------|----------------|
|                                          | HR (95% CI)      | <i>P</i> value | HR (95% CI)      | <i>P</i> value | HR (95% CI)      | <i>P</i> value |
| Overall (N=42,084)                       |                  |                |                  |                |                  |                |
| Model 1                                  | 1.20 (1.12-1.29) | <0.001         | 1.14 (1.06-1.23) | 0.001          | 0.79 (0.72-0.88) | <0.001         |
| Model 2                                  | 1.18 (1.09-1.27) | <0.001         | 1.07 (0.99-1.16) | 0.079          | 0.82 (0.74-0.90) | <0.001         |
| Model 3                                  | 1.01 (0.93-1.09) | 0.842          | 0.94 (0.87-1.02) | 0.140          | 0.88 (0.80-0.97) | 0.010          |
| Model 4                                  | 1.02 (0.95-1.11) | 0.587          | 0.96 (0.89-1.04) | 0.305          | 0.90 (0.81-0.99) | 0.032          |
| Participants with prior MI (N=1,463)     |                  |                |                  |                |                  |                |
| Model 1                                  | 1.13 (0.94-1.34) | 0.189          | 1.07 (0.91-1.27) | 0.408          | 0.92 (0.74-1.15) | 0.473          |
| Model 2                                  | 1.12 (0.94-1.34) | 0.213          | 1.05 (0.89-1.24) | 0.580          | 0.92 (0.73-1.15) | 0.460          |
| Model 3                                  | 1.02 (0.84-1.24) | 0.844          | 0.93 (0.78-1.12) | 0.452          | 0.93 (0.75-1.16) | 0.517          |
| Model 4                                  | 1.05 (0.86-1.28) | 0.642          | 0.92 (0.77-1.10) | 0.378          | 0.92 (0.73-1.15) | 0.439          |
| Participants without prior MI (N=40,621) |                  |                |                  |                |                  |                |
| Model 1                                  | 1.23 (1.13-1.33) | <0.001         | 1.14 (1.05-1.24) | 0.002          | 0.77 (0.69-0.87) | <0.001         |
| Model 2                                  | 1.21 (1.11-1.31) | <0.001         | 1.07 (0.99-1.17) | 0.103          | 0.78 (0.70-0.88) | <0.001         |
| Model 3                                  | 1.03 (0.95-1.13) | 0.471          | 0.95 (0.87-1.04) | 0.262          | 0.86 (0.77-0.95) | 0.005          |
| Model 4                                  | 1.04 (0.95-1.14) | 0.363          | 0.97 (0.89-1.06) | 0.518          | 0.88 (0.79-0.98) | 0.020          |

Abbreviations: CI, confidence interval; HR, hazard ratio; MI, myocardial infarction; MUFA, monounsaturated fatty acid; PUFA, polyunsaturated fatty acid; SFA, saturated fatty acid.

<sup>a</sup> A total of 3,736 participants who had a mean total caloric intake of <500 (N=278) or >3,500 kcal/day (N=3,458) were excluded. Therefore 42,084 participants were included in the analysis.

Model 1: adjusted for age; Model 2: adjusted for age, sex, and ethnicity; Model 3: adjusted for age, sex, ethnicity, obesity, poverty-income ratio, education, physical activity, alcohol consumption, smoking status, survey period, usual intake of protein (natural log transformed), and usual intake of carbohydrate (natural log transformed); Model 4: adjusted for all the factors in Model 3 plus systolic blood pressure (natural log transformed), total cholesterol (natural log transformed), and hemoglobin A<sub>1c</sub> (natural log transformed).



**Supplementary Table 14.** Sensitivity analysis of a 5% higher calorie intake from usual intake of fatty acids and risk for heart disease mortality among 45,820 adults when total cholesterol was replaced by LDL cholesterol for adjustment

| Models                                   | SFA              |                | MUFA             |                | PUFA             |                |
|------------------------------------------|------------------|----------------|------------------|----------------|------------------|----------------|
|                                          | HR (95% CI)      | <i>P</i> value | HR (95% CI)      | <i>P</i> value | HR (95% CI)      | <i>P</i> value |
| Overall (N=45,820)                       |                  |                |                  |                |                  |                |
| Model 1                                  | 1.02 (0.94-1.10) | 0.673          | 0.95 (0.88-1.03) | 0.224          | 0.91 (0.83-1.00) | 0.048          |
| Model 2                                  | 1.02 (0.94-1.10) | 0.687          | 0.95 (0.88-1.03) | 0.209          | 0.91 (0.83-1.00) | 0.048          |
| Participants with prior MI (N=1,541)     |                  |                |                  |                |                  |                |
| Model 1                                  | 1.05 (0.86-1.27) | 0.652          | 0.95 (0.80-1.13) | 0.540          | 0.94 (0.75-1.16) | 0.546          |
| Model 2                                  | 1.05 (0.86-1.27) | 0.655          | 0.95 (0.80-1.13) | 0.534          | 0.94 (0.75-1.17) | 0.559          |
| Participants without prior MI (N=44,279) |                  |                |                  |                |                  |                |
| Model 1                                  | 1.04 (0.95-1.13) | 0.413          | 0.96 (0.88-1.05) | 0.340          | 0.89 (0.80-0.99) | 0.032          |
| Model 2                                  | 1.04 (0.95-1.13) | 0.421          | 0.96 (0.88-1.04) | 0.321          | 0.89 (0.80-0.99) | 0.031          |

Abbreviations: CI, confidence interval; HR, hazard ratio; LDL, low-density lipoprotein; MI, myocardial infarction; MUFA, monounsaturated fatty acid; PUFA, polyunsaturated fatty acid; SFA, saturated fatty acid.

Model 1: adjusted for age, sex, ethnicity, obesity, poverty-income ratio, education, physical activity, alcohol consumption, smoking status, survey period, usual intake of protein (natural log transformed), usual intake of carbohydrate (natural log transformed), systolic blood pressure (natural log transformed), total cholesterol (natural log transformed), and hemoglobin A<sub>1c</sub> (natural log transformed); Model 2: adjusted for all the factors in Model 1 except that total cholesterol (natural log transformed) was replaced by LDL cholesterol.

**Supplementary Table 15.** Major food sources of fatty acids

| SFA          | MUFA          | PUFA           |
|--------------|---------------|----------------|
| Cheese       | Egg           | Mayonnaise     |
| Egg          | Beef          | Egg            |
| Beef         | Sausage       | Fish           |
| Catfish      | Chicken       | French fries   |
| Lasagna      | Pork          | Roll           |
| Roll         | Cheese        | Sunflower seed |
| French fries | Pizza         | Muffin         |
| Cookie       | Cake          | Granola        |
| Fish         | Peanut butter | Chicken        |
| Ice cream    | Almond        | Cake           |
| Mayonnaise   | French fries  | Flax seed      |
| Hot dog      | Milk          | Hot dog        |
| Cake         | Ice cream     | Beef           |
| Cream        | Cookie        | Cheese         |
| Chicken      | Fish          | Nuts           |

MUFA, monounsaturated fatty acid; PUFA, polyunsaturated fatty acid; SFA, saturated fatty acid.
